# Supplementary material for: Analysis of Marrubiin in Marrubium alysson L. Extract Using Advanced HPTLC: Chemical Profiling, Acetylcholinesterase Inhibitory Activity, and Molecular Docking
Source: MDPI journal article supplement (doi:10.3390/metabo14010027), 2023-12-30
Supplement: s1 [file s1]

Article

# Analysis of Marrubiin in *Marrubium alysson* L. Extract Using Advanced HPTLC: Chemical Profiling, Acetylcholinesterase Inhibitory Activity and Molecular Docking

## Supplementary Materials

- 1) **Figure S1.** Chromatograms of HPTLC scanned at  $\lambda = 510$  nm (a: standard marrubiin, b: *M. alysson* L. extract)
- 2) **Figure S2.** Chromatogram of GC-MS analysis of fatty acid methyl esters of *M. alysson* L.
- 3) **Figure S3.** Mass spectra of major phytochemicals listed in Table 1.
- 4) **Figure S4.** Chromatogram of GC-MS analysis of unsaponifiable matter of *M. alysson* L.
- 5) **Figure S5.** Mass spectrum of phytol, a major phytochemical listed in Table 2.

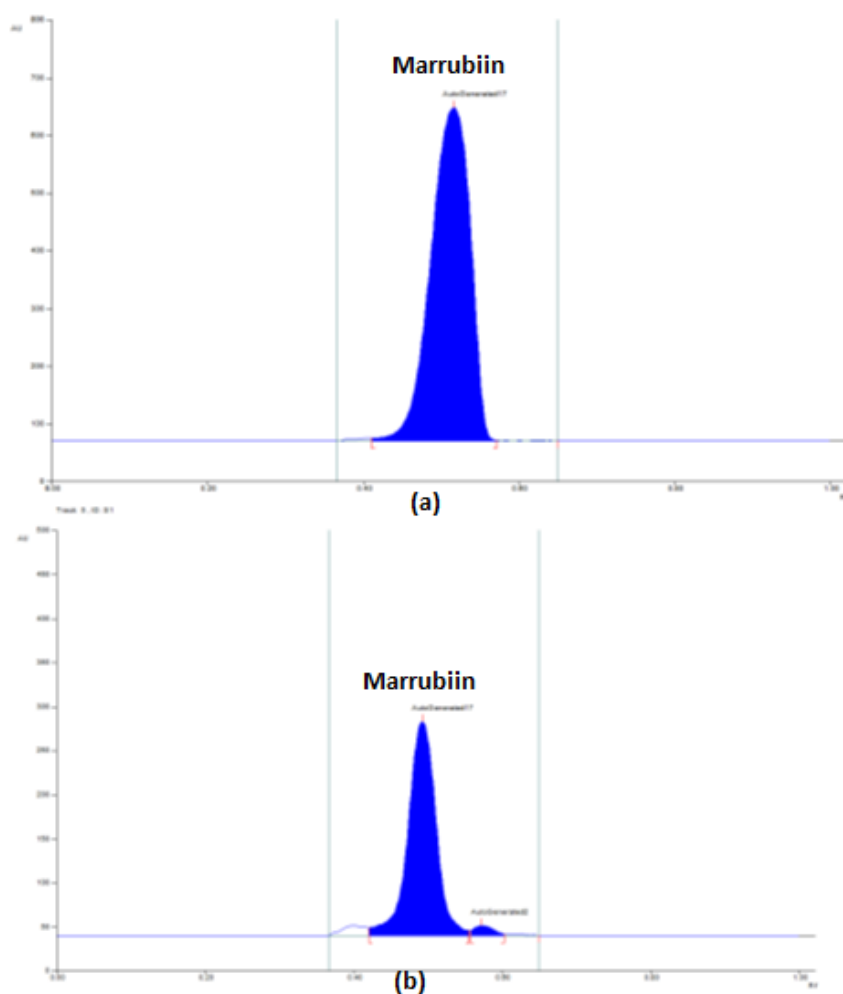

**Figure S1.** Chromatograms of HPTLC scanned at  $\lambda = 510$  nm (a: standard marrubiin, b: *M. alysson* L. extract)

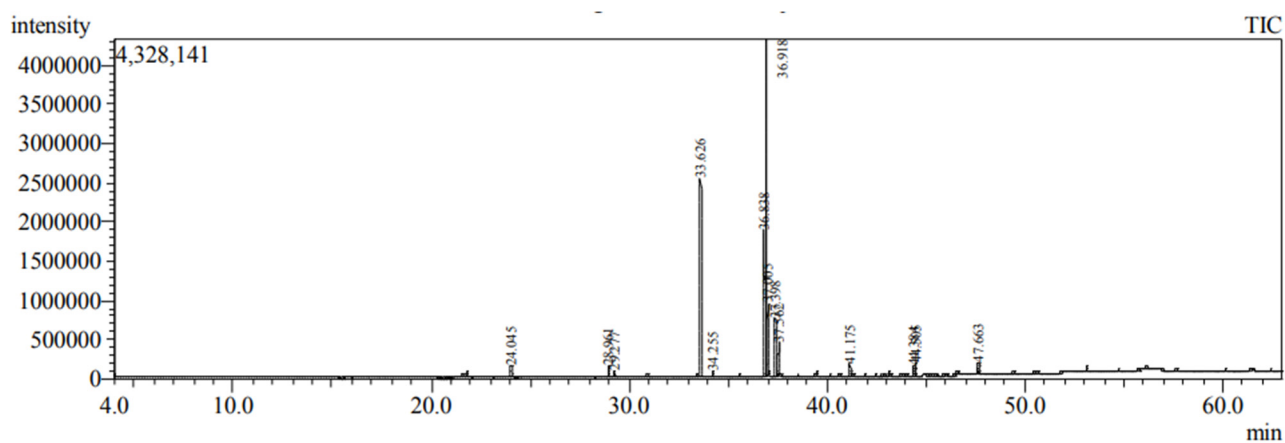

**Figure S2.** Chromatogram of GC-MS analysis of fatty acid methyl esters of *M. alysson* L.

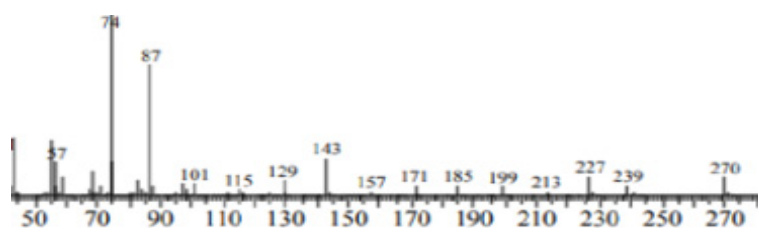

Hexadecanoic acid, methyl ester

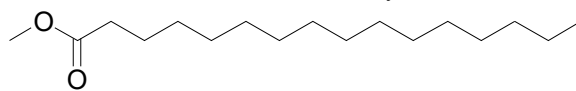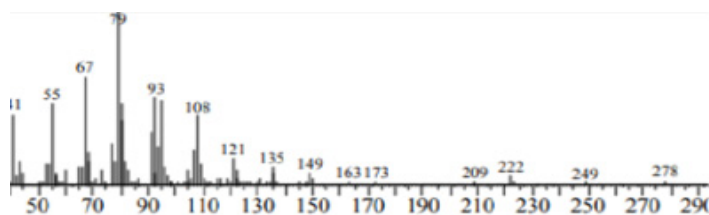

9, 12, 15-Octadecatrienoic acid, methyl ester, (Z,Z,Z)-

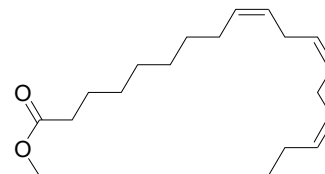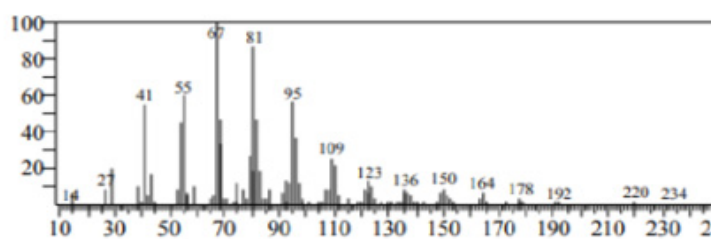

9,12-Octadecadienoic acid (Z,Z)-, methyl ester

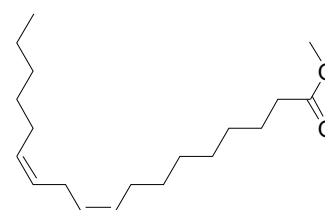

**Figure S3.** Mass spectra of major phytochemicals listed in Table 1.

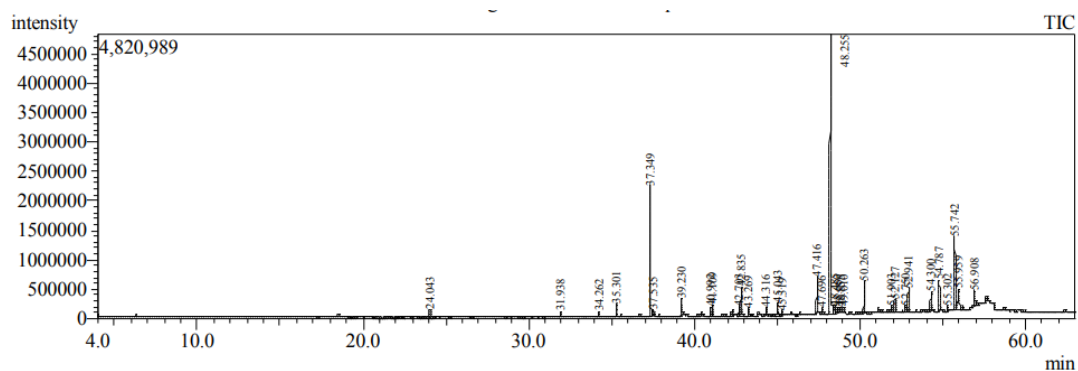

**Figure S4.** Chromatogram of GC-MS analysis of unsaponifiable matter of *M. alysson* L.

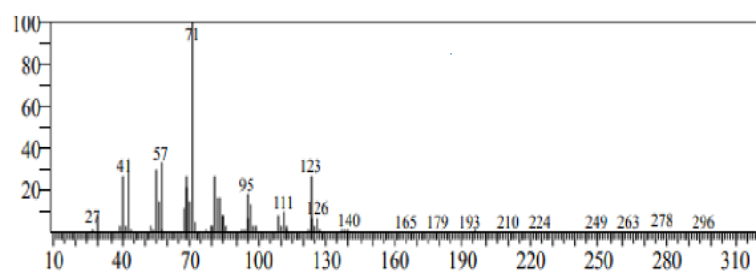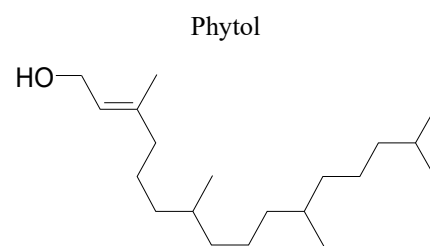

**Figure S5.** Mass spectrum of phytol, a major phytochemical listed in Table 2.
